# Supplementary material
Source: HighWire-hosted journal article supplement (https://rc.rcjournal.com/highwire/filestream/20587/field_highwire_adjunct_files/0/8381suppl.pdf)
Supplement: 8381suppl.pdf [file 8381suppl.pdf]

Table 3a. Predictors of cigarette and e-cigarette use among participants (compared to e-cigarette use only) in the National Longitudinal Study of Adolescent to Adult Health Wave 5, (n=3,703).

|                         | No cigarette use          | Cigarette use only | Both e-cigarette and cigarette use |
|-------------------------|---------------------------|--------------------|------------------------------------|
| Sex                     |                           |                    |                                    |
| Male                    | 1.00                      | 1.00               | 1.00                               |
| Female                  | <b>2.82 (1.53, 5.21)</b>  | 1.69 (0.90, 3.18)  | 1.13 (0.52, 2.44)                  |
| Age                     | 1.04 (0.88, 1.24)         | 1.05 (0.87, 1.24)  | 1.08 (0.87, 1.35)                  |
| Poverty status          |                           |                    |                                    |
| No                      | 1.00                      | 1.00               | 1.00                               |
| Yes                     | <b>0.31 (0.13, 0.77)</b>  | 1.11 (0.44, 2.76)  | 0.81 (0.26, 2.59)                  |
| Race                    |                           |                    |                                    |
| White                   | 1.00                      | 1.00               | 1.00                               |
| Hispanic                | <b>4.78 (1.13, 20.17)</b> | 1.74 (0.30, 7.59)  | 4.10 (0.85, 19.85)                 |
| Black/African American  | 3.05 (0.92, 10.12)        | 2.98 (0.89, 10.04) | 1.72 (0.41, 7.25)                  |
| Other                   | 0.77 (0.33, 1.81)         | 0.49 (0.20, 1.21)  | 0.63 (0.19, 2.08)                  |
| Diagnosed depression    |                           |                    |                                    |
| No                      | 1.00                      | 1.00               | 1.00                               |
| Yes                     | <b>0.42 (0.21, 0.86)</b>  | 0.72 (0.35, 1.50)  | 0.85 (0.34, 2.09)                  |
| Diagnosed anxiety       |                           |                    |                                    |
| No                      | 1.00                      | 1.00               | 1.00                               |
| Yes                     | 0.66 (0.31, 1.38)         | 0.86 (0.40, 1.84)  | 0.74 (0.28, 1.93)                  |
| Experienced child abuse |                           |                    |                                    |
| No                      | 1.00                      | 1.00               | 1.00                               |
| Yes                     | <b>0.44 (0.24, 0.80)</b>  | 0.63 (0.34, 1.16)  | 0.80 (0.37, 1.69)                  |

Note. Reference is “e-cigarette use only.”

Table 3b. Predictors of cigarette and e-cigarette use among participants (compared to cigarette use only) in the National Longitudinal Study of Adolescent to Adult Health Wave 5, (n=3,703)

|                         | No cigarette use         | E-cigarette use only | Both e-cigarette and cigarette use |
|-------------------------|--------------------------|----------------------|------------------------------------|
| Sex                     |                          |                      |                                    |
| Male                    | 1.00                     | 1.00                 | 1.00                               |
| Female                  | <b>1.67 (1.35, 2.06)</b> | 0.59 (0.31, 1.11)    | 0.67 (0.39, 1.12)                  |
| Age                     | 1.00 (0.94, 1.06)        | 0.96 (0.80, 1.14)    | 1.03 (0.89, 1.20)                  |
| Poverty status          |                          |                      |                                    |
| No                      | 1.00                     | 1.00                 | 1.00                               |
| Yes                     | <b>0.28 (0.20, 0.39)</b> | 0.90 (0.36, 2.26)    | 0.74 (0.33, 1.63)                  |
| Race                    |                          |                      |                                    |
| White                   | 1.00                     | 1.00                 | 1.00                               |
| Hispanic                | <b>2.75 (1.87, 4.06)</b> | 0.90 (0.13, 2.51)    | 0.74 (1.11, 5.03)                  |
| Black/African American  | 1.02 (0.77, 1.35)        | 0.57 (0.10, 1.13)    | 2.36 (0.25, 1.34)                  |
| Other                   | <b>1.58 (1.05, 2.38)</b> | 0.34 (0.83, 5.04)    | 0.58 (0.51, 3.29)                  |
| Diagnosed depression    |                          |                      |                                    |
| No                      | 1.00                     | 1.00                 | 1.00                               |
| Yes                     | <b>0.59 (0.45, 0.76)</b> | 1.39 (0.67, 2.88)    | 1.17 (0.63, 2.18)                  |
| Diagnosed anxiety       |                          |                      |                                    |
| No                      | 1.00                     | 1.00                 | 1.00                               |
| Yes                     | 0.76 (0.58, 1.01)        | 1.17 (0.54, 2.50)    | 0.87 (0.44, 1.69)                  |
| Experienced child abuse |                          |                      |                                    |
| No                      | 1.00                     | 1.00                 | 1.00                               |
| Yes                     | <b>0.70 (0.56, 0.87)</b> | 1.58 (0.86, 2.91)    | 1.26 (0.75, 2.11)                  |

Note. Reference is “cigarette use only.”

Table 3c. Predictors of cigarette and e-cigarette use among participants (compared to e-cigarette and cigarette use) in the National Longitudinal Study of Adolescent to Adult Health Wave 5, (n=3,703)

|                         | No cigarette use         | E-cigarette use only | Cigarette use            |
|-------------------------|--------------------------|----------------------|--------------------------|
| Sex                     |                          |                      |                          |
| Male                    | 1.00                     | 1.00                 | 1.00                     |
| Female                  | <b>2.50 (1.52, 4.13)</b> | 0.89 (0.41, 1.93)    | 1.50 (0.90, 2.53)        |
| Age                     | 0.97 (0.84, 1.11)        | 0.93 (0.84, 1.15)    | 0.97 (0.83, 1.12)        |
| Poverty status          |                          |                      |                          |
| No                      | 1.00                     | 1.00                 | 1.00                     |
| Yes                     | <b>0.38 (0.18, 0.84)</b> | 1.23 (0.39, 3.90)    | 1.36 (0.62, 3.00)        |
| Race                    |                          |                      |                          |
| White                   | 1.00                     | 1.00                 | 1.00                     |
| Hispanic                | 1.17 (0.59, 2.30)        | 0.24 (0.05, 1.18)    | <b>0.42 (0.20, 0.90)</b> |
| Black/African American  | 1.77 (0.89, 4.00)        | 0.58 (0.14, 2.44)    | 1.73 (0.75, 4.00)        |
| Other                   | 1.22 (0.51, 2.94)        | 1.58 (0.48, 5.19)    | 0.77 (0.30, 1.97)        |
| Diagnosed depression    |                          |                      |                          |
| No                      | 1.00                     | 1.00                 | 1.00                     |
| Yes                     | <b>0.50 (0.28, 0.91)</b> | 1.18 (0.48, 2.92)    | 0.85 (0.46, 1.59)        |
| Diagnosed anxiety       |                          |                      |                          |
| No                      | 1.00                     | 1.00                 | 1.00                     |
| Yes                     | 0.88 (0.46, 1.68)        | 1.35 (0.52, 3.52)    | 1.16 (0.59, 2.26)        |
| Experienced child abuse |                          |                      |                          |
| No                      | 1.00                     | 1.00                 | 1.00                     |
| Yes                     | <b>0.55 (0.34, 0.91)</b> | 1.25 (0.59, 2.66)    | 0.79 (0.47, 1.33)        |

Note. Reference is “e-cigarette and cigarette use only.”
